**Hemocyanin with phenoloxidase activity in the chitin matrix of the** 1  
**crayfish gastrolith** 2

Lilah Glazer<sup>1,2</sup>, Moshe Tom<sup>3</sup>, Simy Weil<sup>1</sup>, Ziv Roth<sup>1,4</sup>, Isam Khalaila<sup>4</sup>, Binyamin Mittelman<sup>1,2</sup> 3  
and Amir Sagi<sup>1,2,a</sup> 4

<sup>1</sup>Department of Life Sciences, Ben-Gurion University of the Negev, Beer Sheva 8410501, 5  
Israel 6

<sup>2</sup>National Institute for Biotechnology in the Negev, Ben-Gurion University, Beer Sheva 8  
8410501, Israel 9

<sup>3</sup>Israel Oceanographic and Limnological Research, Haifa, 8511911, Israel 10

<sup>4</sup>Avram and Stella Goldstein-Goren Department of Biotechnology Engineering, Ben-Gurion 11  
University of the Negev, Beer Sheva 8410501, Israel 12

<sup>a</sup>Author for correspondence: (e-mail [sagia@bgu.ac.il](mailto:sagia@bgu.ac.il)). 13

Telephone: +972-8-6461364 14

Fax: +972-8-6479062 15

**Short title:** Hemocyanin from the crayfish gastrolith 16

**Key words:** crayfish, cuticle, gastrolith matrix, hemocyanin, phenoloxidase, sclerotization 17

|                                                                                                       |    |
|-------------------------------------------------------------------------------------------------------|----|
| <b>Summary</b>                                                                                        | 33 |
| Gastroliths are transient extracellular calcium deposits formed by the crayfish                       | 34 |
| <i>Cherax quadricarinatus</i> von Martens on both sides of the stomach wall during pre-molt.          | 35 |
| Gastroliths are made of a rigid chitinous organic matrix, constructed as sclerotized chitin-          | 36 |
| protein microfibrils within which calcium carbonate is deposited. Although gastroliths share          | 37 |
| many characteristics with the exoskeleton, they are simpler in structure and relatively               | 38 |
| homogenous in composition, making them an excellent cuticle-like model for the study of               | 39 |
| cuticular proteins. In searching for molt-related proteins involved in gastrolith formation, two      | 40 |
| integrated approaches were employed, namely the isolation and mass spectrometric analysis             | 41 |
| of proteins from the gastrolith matrix, and 454-sequencing of mRNAs from both the                     | 42 |
| gastrolith-forming and sub-cuticular epithelia. SDS-PAGE separation of gastrolith proteins            | 43 |
| revealed a set of bands at apparent molecular weights of 75-85 kDa, of which peptide                  | 44 |
| sequencing following mass spectrometry matched the deduced amino acid sequences of seven              | 45 |
| hemocyanin transcripts. This assignment was then examined by immunoblot analysis using                | 46 |
| anti-hemocyanin antibodies, also used to determine the spatial distribution of the proteins <i>in</i> | 47 |
| <i>situ</i> . Apart from contributing to oxygen transport, crustacean hemocyanins were previously     | 48 |
| suggested as being involved in several aspects of the molt cycle, including hardening of the          | 49 |
| new post-molt exoskeleton via phenoloxidation. The phenoloxidase activity of gastrolith               | 50 |
| hemocyanins was demonstrated. It was also noted that hemocyanin transcript expression                 | 51 |
| during pre-molt was specific to the hepatopancreas. Our results thus reflect a set of                 | 52 |
| functionally versatile proteins, expressed in a remote metabolic tissue and dispersed via the         | 53 |
| hemolymph to perform different roles in various organs and structures.                                | 54 |
|                                                                                                       | 55 |
|                                                                                                       | 56 |

**Introduction** 57

Arthropods, comprising the largest group of animal species, possess rigid exoskeletons 58  
composed of an organic matrix consisting of chitin-protein microfibrils (Blackwell and Weih, 59  
1980; Lowenstam and Weiner, 1989). These microfibrils form a network of chitin-protein 60  
layers that are helicoidally stacked into a twisted plywood pattern (Bouligand, 1972; Raabe et 61  
al., 2005). The rigidity of the exoskeleton is achieved through sclerotization, namely the 62  
enzymatic oxidation of phenols or catechols, which then crosslink with and harden cuticular 63  
proteins and chitin (Kuballa and Elizur, 2008). In most crustacean species, exoskeletons are 64  
further hardened by the deposition of minerals, mainly calcium carbonate (Lowenstam and 65  
Weiner, 1989). 66

In crustaceans, as in all arthropods, the exoskeleton is periodically shed and rebuilt in a 67  
process known as molting, thus enabling growth. Molting is accompanied by a significant loss 68  
of cuticular calcium, quickly regained during post-molt so as to enable the animal to begin 69  
feeding. In crayfish (Travis, 1963a; Travis, 1963b), lobsters, and some land crabs (Luquet and 70  
Marin, 2004), pre-molt preparation is accompanied by the formation of calcium carbonate 71  
storage organs, called gastroliths, on both sides of the stomach wall. 72

Like the exoskeleton, gastroliths are composed of a chitin-protein organic matrix into 73  
which calcium carbonate is deposited (Luquet and Marin, 2004; Roer and Dillaman, 1984), 74  
and their forming epithelia are continuous. Moreover, at least two structural gastrolith 75  
proteins were identified as expressed in the sub-cuticle epithelium as well as the gastrolith- 76  
forming epithelium (Glazer et al., 2010; Yudkovski et al., 2010). However, gastroliths lack 77  
the structural complexity of the cuticle in terms of the four different layers typical of the 78  
cuticle, as well as other properties (Shechter et al., 2008a; Travis, 1960; Travis, 1963a). For 79  
this reason, we previously suggested that gastroliths can serve as a relatively simple 80  
extracellular model for the study of certain aspects of exoskeletal matrices in a biological 81  
system (Glazer and Sagi, 2012). 82

Members of the arthropod hemocyanin superfamily contribute to the cross-linking of 83  
cuticular proteins and chitins to induce cuticle hardening or sclerotization. This superfamily 84  
includes five classes of proteins, namely hemocyanins, phenoloxidases, non-respiratory 85  
crustacean cryptocyanins (pseudo-hemocyanins), insect hexamerins and hexamerin receptors 86  
(Burmester, 2002). Of these, the phenoloxidases are involved in sclerotization, in the melanin- 87  
forming pathway, in wound healing and in the humoral immune system (Burmester, 2002; 88  
Sugumaran, 1998). Moreover, phenoloxidase and hemocyanin both bind oxygen through 89  
'type 3' copper-containing domains (Burmester, 2002), with hemocyanins transporting 90

oxygen in the hemolymph of many arthropod species (Burmester, 2002; Markl and Decker, 1992; van Holde and Miller, 1995). Crustacean phenoloxidasases are derived from inactive prophenoloxidasases in hemocytes (Aspan et al., 1995). These precursors are secreted into the hemolymph, where they can be activated by specific proteinases or can be deposited in the cuticle, where they are activated on site (Soderhall and Cerenius, 1998). Crustacean hemocyanins are expressed in the hepatopancreas of several species (Adachi et al., 2005; Durstewitz and Terwilliger, 1997; van Holde and Miller, 1995) and are secreted to the hemolymph, where they occur as large extracellular multi-subunit molecules (van Holde and Miller, 1995). Hemocyanin can also be converted into phenoloxidasase (Adachi et al., 2005; Adachi et al., 2001; Decker and Jaenicke, 2004). In addition, Adachi et al. (2005) identified hemocyanins in the cuticle of the shrimp *Penaeus japonicus* Spence Bate, and demonstrated the *in vitro* phenoloxidasase activity of the enzyme. These authors further suggested that cuticular hemocyanin functions as a sclerotizing agent and/or an innate immunity factor.

In a study performed by Bentov et al. (2010) on proteins extracted from the gastrolith matrix of the crayfish *Cherax quadricarinatus*, a doublet ~70–75 kDa band was identified and later termed GAP 75 (Glazer and Sagi, 2012). At that time, the sequences of the protein or its coding transcript were not known. Accordingly, the present study focused on these protein bands and demonstrated them to contain hemocyanin proteins. The distribution of these proteins within the extracellular matrix of the gastrolith was studied immunologically. At the same time, transcript tissue expression pattern was determined. Lastly, phenoloxidasase activity of the gastrolith hemocyanin was assayed.

91  
92  
93  
94  
95  
96  
97  
98  
99  
100  
101  
102  
103  
104  
105  
106  
107  
108  
109  
110  
111  
112

|                                                                                                                                                                                                                                                                                                                                                                                                                                                                                                                                                                                                                                                                                                                                                                                                                                                                                                                                                                                                                                                                                                                                                                                         |                                                                                         |
|-----------------------------------------------------------------------------------------------------------------------------------------------------------------------------------------------------------------------------------------------------------------------------------------------------------------------------------------------------------------------------------------------------------------------------------------------------------------------------------------------------------------------------------------------------------------------------------------------------------------------------------------------------------------------------------------------------------------------------------------------------------------------------------------------------------------------------------------------------------------------------------------------------------------------------------------------------------------------------------------------------------------------------------------------------------------------------------------------------------------------------------------------------------------------------------------|-----------------------------------------------------------------------------------------|
| <b>Materials &amp; methods</b>                                                                                                                                                                                                                                                                                                                                                                                                                                                                                                                                                                                                                                                                                                                                                                                                                                                                                                                                                                                                                                                                                                                                                          | 113                                                                                     |
| <i>Animals and molt:</i>                                                                                                                                                                                                                                                                                                                                                                                                                                                                                                                                                                                                                                                                                                                                                                                                                                                                                                                                                                                                                                                                                                                                                                | 114                                                                                     |
| <i>C. quadricarinatus</i> males were grown in artificial ponds at Ben-Gurion University of the Negev, Beer-Sheva, Israel, under conditions described in Shechter et al. (2008a). Inter-molt crayfish were held in individual cages and endocrinologically induced to enter pre-molt through removal of the X organ-sinus gland (XO-SG) complex or, specifically for the 454-sequencing, through daily injection of 0.3µg α-ecdysone per 1gr animal weight. Progression of the molt cycle was monitored daily by measuring the gastrolith molt mineralization index (MMI), as described by Shechter et al. (2007). For all dissection procedures, crayfish were placed on ice for 5-10 min, until anesthetized.                                                                                                                                                                                                                                                                                                                                                                                                                                                                          | 115<br>116<br>117<br>118<br>119<br>120<br>121<br>122                                    |
|                                                                                                                                                                                                                                                                                                                                                                                                                                                                                                                                                                                                                                                                                                                                                                                                                                                                                                                                                                                                                                                                                                                                                                                         | 123                                                                                     |
| <i>Purification, separation and visualization of gastrolith proteins:</i>                                                                                                                                                                                                                                                                                                                                                                                                                                                                                                                                                                                                                                                                                                                                                                                                                                                                                                                                                                                                                                                                                                               | 124                                                                                     |
| Gastroliths were dissected from induced pre-molt crayfish, cleaned and ground to powder in liquid nitrogen. Gastrolith proteins were extracted and separated following the procedure detailed in Shechter et al. (2008b). Briefly, EGTA-extracted gastrolith proteins were incubated with DEAE resin, batch-wise. Washes with 0.1-1 M NaCl in a step gradient with 0.1 M increments were performed. Fractions collected at 0.2-0.3 M NaCl were separated on a 9% SDS-PAGE (1.5 mm thick) gel with Tris-glycine running buffer, according to Laemmli et al. (1970). Bands were visualized by Coomassie brilliant blue staining (CBB).                                                                                                                                                                                                                                                                                                                                                                                                                                                                                                                                                    | 125<br>126<br>127<br>128<br>129<br>130<br>131                                           |
|                                                                                                                                                                                                                                                                                                                                                                                                                                                                                                                                                                                                                                                                                                                                                                                                                                                                                                                                                                                                                                                                                                                                                                                         | 132                                                                                     |
| <i>Mass spectrometry (MS):</i>                                                                                                                                                                                                                                                                                                                                                                                                                                                                                                                                                                                                                                                                                                                                                                                                                                                                                                                                                                                                                                                                                                                                                          | 133                                                                                     |
| Reduction, alkylation and trypsinization steps were carried out according to Roth et al. (2010). The resulting peptides were loaded onto a house-made reverse-phase column (15 cm long, 75 µm internal diameter) packed with Jupiter C18, 300Å, 5 µm beads (Phenomenex, Torrance, CA, USA) and connected to a Eksigent nano-LC system (Eksigent, Dublin, CA, USA). Chromatography was performed with two solutions, buffer A (2% acetonitrile in 0.1% formic acid) and buffer B (80% acetonitrile in 0.1% formic acid), via a linear gradient (20–60%) created by buffer B over 45 min. MS peptide analysis and tandem MS fragmentation were performed using the LTQ-Orbitrap (Thermo Fisher Scientific). The mass spectrometer was operated in the data-dependent mode to enable switching between MS and collision-induced dissociation tandem MS analyses of the top eight ions. The collision-induced dissociation fragmentation was performed at 35% collision energy with a 30 msec activation time. Proteins were identified and validated either against the UniProtKB/Swiss-Prot or against an internal database containing 454-sequenced <i>C. quadricarinatus</i> hemocyanin | 134<br>135<br>136<br>137<br>138<br>139<br>140<br>141<br>142<br>143<br>144<br>145<br>146 |

sequences, using the Sequest algorithm operated under Proteome Discoverer 1.2 software 147  
(Thermo Fisher Scientific). The following search parameters were used: Enzyme specificity 148  
trypsin, maximum two missed cleavage sites, cysteine carbamidomethylation, methionine 149  
oxidation and a maximum of 10 ppm or 0.8 Da error tolerance for full scan and MS/MS 150  
analysis, respectively. Protein identification criteria were defined as having at least one 151  
peptide with a false discovery rate (FDR) p-value <0.01. 152

#### *Western-blot analysis:* 153

For western blot analyses, proteins were separated on 9 or 10% SDS-PAGE (1.5 mm thick) 155  
gels with the tricine running buffer system, according to Schagger and von Jagow (1987), as 156  
described by the manufacturer, and transferred to a nitrocellulose membrane. Following 157  
blocking with 5% skim milk in Tris-buffered saline (TBS), the membrane was incubated with 158  
anti-hemocyanin antisera (Tom et al., 1993) at a dilution of 1:1,000 (v/v). After washing with 159  
TBS containing 0.1% Tween-20 (TBST), the membrane was incubated with horseradish 160  
peroxidase (HRP)-conjugated goat anti-rabbit immunoglobulin G secondary antibodies 161  
(1:15,000, v/v). Antibody binding was detected using an EZ-ECL chemiluminescence 162  
detection kit (Biological Industries, Kibbutz Beit Haemek, Israel). 163

#### *Immunohistochemistry:* 164

For the immunohistochemistry assay, whole gastrolith pouches were submerged in a 166  
decalcifying fixative containing 7% EDTA and 0.2% gluteraldehyde in phosphate-buffered 167  
saline (PBS), and then dehydrated in ethanol and embedded in paraffin. Five  $\mu\text{m}$ -thick 168  
paraffin sections were deparaffinized, rehydrated, incubated in citrate buffer (0.5 M, pH 6.0, 169  
30 min at 95°C) for antigen retrieval and washed in PBS (10 mM, pH 7.4). Blocking (2% 170  
normal goat serum, 0.1% Triton X 100, 0.05% Tween 20 in PBS) was performed for 1 h at 171  
room temperature, followed by incubation with anti-hemocyanin antisera as primary 172  
antibodies (1:500, v/v). Slides were washed in PBS and incubated with secondary goat anti- 173  
rabbit FITC-conjugated antibodies (1:250 in PBS with 0.2% fish skin gelatin) for 1 h at room 174  
temperature. After PBS washes, slides were mounted (DAPI 1:1000 in PBS and 50% 175  
glycerol) and imaged using a fluorescence microscope. 176

#### *454-sequencing and bioinformatics analysis:* 177

RNA was extracted from the gastrolith-forming and the sub-cuticular epithelia pooled from 179  
crayfish at four different molt stages, namely inter-molt, early pre-molt, late pre-molt and 180

post-molt. Five to seven animals were sampled for each molt stage. Ten µg of total RNA in H<sub>2</sub>O were sent to DYN LABS (Caesarea, Israel) for pyro-sequencing using the GS-FLX titanium device (Roche, Switzerland). A 7/16 fraction of a sequencing plate was used, yielding a total of 276,377 reads, consisting of 96,748,000 bases. Sequence assembly and a Blast2GO search were performed by DYN LABS (Assaf Harofe Medical Center, Israel). Of the 16 annotated *hemocyanin*-family sequences, the 13 unique sequences were deposited at DDBJ/EMBL/GenBank as part of a Transcriptome Shotgun Assembly (TSA) project under the accession GADE00000000 (the version described in this paper is the first version, GADE01000000).

*Pre-molt expression pattern:*

To identify tissue-specific hemocyanin expression, RNA was extracted from the gastrolith-forming epithelium, sub-cuticular epithelium, hepatopancreas, muscle, testis and hemocytes. First-strand cDNA was generated with oligo (dT)<sub>18</sub>VN using expand-RT reverse transcriptase (Roche Diagnostics, Mannheim, Germany). PCR was performed with the following primers: Hem\_2\_F1 (5'-CAGCGTCGTGGATCAGTTGAGGGAAGG-3') and Hem\_2\_R1 (5'-CACGCCCACGCTGACCACGACGATA-3') for amplification of *CqHC5,6* and 8 or Hem\_3\_F1 (5'-GCCACACCATCAACATCTTCAAAGTGTACATC-3') and Hem\_3\_R1 (5'-ACACTGCAAGACCTGGTCTTGCTTCGTT-3') for amplification of *CqHc2*.

*Zymographic assay of phenoloxidase activity:*

Thirty µg of each protein fraction were separated on SDS-PAGE, in the presence of 0.5 mM CaCl<sub>2</sub>, followed by transfer to a nitrocellulose membrane. The membrane was stained for phenoloxidase activity based on the method of Nellaiappan and Vinayagam (1993), with modifications. Briefly, the membrane was incubated overnight at room temperature in phosphate buffer (100 mM NaHPO<sub>4</sub>, pH 7.4) containing 0.1% SDS, 2 mM L-DOPA and 1 mM CaCl<sub>2</sub> until the appearance of specific purple staining.

**Results** 209

SDS-PAGE separation of proteins extracted from the gastrolith matrix revealed a set of bands between 75-85 kDa, that could be enriched and partially purified by elution from a DEAE resin with 0.2-0.3 M NaCl (Fig. 1, middle lane). These bands were excised from the gel and subjected to peptide analysis using tandem MS. Performing a Sequest search against the UniProt database revealed that the isolated bands showed moderate similarity in mass to hemocyanin proteins from four different crustaceans (Table 1). In light of this finding, hemocyanin purified from the crayfish hemolymph was also subjected to SDS-PAGE separation followed by MS analysis (Fig. 1, right lane). A similar identification pattern was obtained (Table 1).

After this initial MS identification, we considered the cross-reactivity of the crayfish proteins by western blot analysis using anti-hemocyanin antiserum raised against hemolymph hemocyanin of the shrimp *Penaeus semisulcatus* De Haan (Tom et al., 1993) (Fig. 2A). The antibodies cross-reacted with both hemolymph and gastrolith hemocyanins from our crayfish but not with bovine serum albumin (BSA), a negative control. We then employed the antibodies in an immunohistochemical assay performed on sections of decalcified gastrolith pouches. Hematoxylin and eosin (H&E) staining (Fig. 2B, left panel) shows the chitin layers forming the gastrolith matrix surrounded by the gastrolith-forming epithelium and its attached connective tissue. Green fluorescence indicates that the protein is present throughout the width of the chitinous structure but is especially concentrated along specific chitin layers (Fig. 2B, middle image). Weak immunostaining was also observed in the cytoplasm but not in the nuclei of the gastrolith-forming epithelium cells, while a stronger reaction was seen in the surrounding connective tissue (Fig. 2B, middle and right panels).

Next-generation 454-sequencing was performed on RNA extracts of gastrolith-forming and sub-cuticular epithelia pooled from crayfish in four different molt stages, namely inter-molt, early pre-molt, late pre-molt and post-molt. Following assembly and translation, Blast2GO analysis was performed on 3,520 isotig sequences against the UniProt database (Fig. 3A). Of the total number of isotigs obtained, 43% did not show similarity to any other protein in the database, 3% were similar to predicted/hypothetical proteins and 54% showed significant similarity to annotated sequences (Fig. 3A, left pie). The annotated sequences were grouped according to their predicted biological function, including a group of 16 sequences that were annotated as proteins from the hemocyanin-family, with different sequencing coverages (Fig. 3A, right pie). Of the 16 hemocyanin-family isotigs, 12 were identified as hemocyanin, 3 as *C. quadricarinatus* cryptocyanin (CqCc) and one as *C. quadricarinatus*



prophenoloxidase (CqPPO) (Fig. 3B). Four of the 12 hemocyanin isotigs were found to be identical and were, therefore, designated as a single sequence, resulting in a total of 9 unique *C. quadricarinatus* hemocyanins (CqHc). Table 2 presents a new Sequest search, based on the same MS data obtained from the bands shown in Fig. 1, this time, however, using the assembled and annotated 454-sequencing isotigs as database. Of the 9 CqHc predicted proteins, 7 were identified in the gastrolith-extracted protein profile. The same hemocyanin proteins were also identified in the hemolymph hemocyanin extraction, along with an additional eighth protein, unique to this fraction.

The expression pattern of *hemocyanin* mRNAs was tested in pre-molt crayfish by RT-PCR in several different tissues. Such efforts revealed that *hemocyanin* transcripts were specifically expressed in the hepatopancreas (Fig. 4, upper panel). No expression was detected in any other tissues, including both epithelial tissues (i.e. the gastrolith-forming and sub-cuticular epithelia) and hemocytes.

Finally, gastrolith hemocyanin, as visualized by CBB staining following SDS-PAGE (Fig. 5A), was tested for phenoloxidase activity in the presence of SDS, L-DOPA and  $\text{Ca}^{2+}$  (Fig. 5B). Strong activity was detected in the enriched and purified fraction of gastrolith hemocyanin, as reflected by the appearance of two distinct bands (Fig. 5A,B, lane 1). The specificity of the reaction within the EGTA-soluble gastrolith protein population is demonstrated in lane 2, where the band at position 'a', containing gastrolith hemocyanins, displays strong phenoloxidase activity, while the band at position 'b', containing another protein named GAP 65, is not active. In these experiments, hemolymph hemocyanin served as positive control (Fig. 5A,B, lane 3), while BSA served as negative control (Fig. 5A,B, lane 4). Western blot analysis confirmed the identity of the hemocyanin bands (Fig. 5C).

**Discussion** 267

In this study, we revealed the presence of hemocyanin proteins in the extracellular matrix 268  
of gastroliths deposited by the crayfish *C. quadricarinatus*. This identification results from the 269  
extensive mapping of the *C. quadricarinatus* gastrolith proteome and transcriptome we are 270  
currently performing, using the gastrolith as a simple model to study the involvement of 271  
proteins in crustacean skeletal construction. Initial identification of the proteins considered in 272  
this study was achieved by MS, as part of the proteomic mapping process, and was further 273  
supported by western blot analysis. The transcriptomic mapping yielded the partial sequences 274  
of nine hemocyanin transcripts, with the protein products of seven of them being found in the 275  
gastrolith matrix. 276

Our RT-PCR assay revealed that hemocyanin transcripts were uniquely expressed in the 277  
hepatopancreas during pre-molt. Specific expression in the hepatopancreas was also 278  
demonstrated for the freshwater crayfish *Pacifastacus leniusculus* Dana by Northern blot 279  
analysis (Lee et al., 2004) and for *Astacus leptodactylus* Eschscholtz by immunoprecipitation 280  
(Gellissen et al., 1991). No expression was detected in the hemocytes of any crayfish, 281  
although in the prawn *P. japonicus*, *hemocyanin* expression was detected by RT-PCR in 282  
hemocytes, as well as in the hepatopancreas (Adachi et al., 2005). Furthermore, the protein 283  
was extracted from the cuticle of the prawn and immunolocalized to the exo- and 284  
endocuticular layers, leading the authors to suggest that cuticular hemocyanin is mainly 285  
synthesized in the hepatopancreas, from where it is transferred through the hemolymph and 286  
via the epidermal layer underlying the cuticle to the exoskeleton. We offer a similar scenario 287  
for gastrolith hemocyanins, providing some extent of support with the presence of the protein 288  
in the connective tissue surrounding the gastrolith pouch, as well as in the cytoplasm of the 289  
gastrolith-forming cells, as revealed by immunolocalization. Specific expression in the 290  
hepatopancreas however, does not fully coincide with the tissues from which we obtained our 291  
hemocyanin transcripts, namely the gastrolith-forming and sub-cuticular epithelia. Since the 292  
gastrolith-forming epithelium is highly penetrated by hemocytes ('blood cells') (Ueno, 1980), 293  
*hemocyanin* expression was sought but not detected in these cells. The most probable 294  
explanation for this apparent contradiction is the sequencing of residual transcript expression. 295  
Sequencing of transcripts that are expressed in very small copy numbers, and are actually 296  
non-functional, may be the result of the new next-generation sequencing methods, such as 297  
454-sequencing, given their vast sequencing depth. Transcript expression experiments using 298  
the RNAseq analytical procedure may prove the presented assumption by quantitating the 299  
expression. 300

The presence of hemocyanins in the chitinous matrix of a temporary calcium storage organ, such as the gastrolith, raises the question of the role of hemocyanins in this structure. One possible explanation is that these hemolymph-circulating proteins diffuse into the growing matrix through the open vascular system penetrating the forming epithelium, possibly acting as transporters of oxygen or even of ecdysone (Jaenicke et al., 1999). The hemocyanins would thus be trapped within the chitin network as the layers rapidly accumulate. A second explanation is that hemocyanins play a structural role, perhaps as sclerotizing agents hardening the 3D chitinous network that serves as a solid scaffold for deposition of stored calcium. In her work on the Dungeness crab, *Cancer magister* Dana, Terwilliger (2007) suggested that crab hemocyanin may be converted from transporting oxygen to functioning as phenoxidase during molting, when there is a need for concerted and rapid sclerotization. In an earlier work, Terwilliger and colleagues (2005) showed in juvenile crabs that the hemolymph concentration of hemocyanin cyclically decreased at ecdysis, and increased as pre-molt progressed until the next molt event. At the transcript level, *hemocyanins* of the crab *Portunus pelagicus* Linnaeus showed high levels of expression in the inter-molt and pre-molt stages, when compared to ecdysis and post-molt (Kuballa and Elizur, 2008; Kuballa et al., 2011). In *C. quadricarinatus*, a microarray experiment comparing hepatopancreas gene expression in inter-molt vs. pre-molt and post-molt animals by Yudkovski et al. (2007) indicated a reduction in the transcription levels of one *hemocyanin* gene in inter-molt, while another *hemocyanin* gene was most highly transcribed in inter-molt. In the present study, hemocyanin was observed within the gastrolith matrix, showing a distribution pattern with seemingly higher concentrations of the protein along certain chitin-formed layers. The observed pattern could be due to changes in composition along the gastrolith vertical axis or perhaps fluctuations in the rate of layer formation and secretion of matrix ingredients from the forming epithelium. In addition, some protein may have been extracted during decalcification despite the use of fixative along with the decalcifying solution. Gastrolith formation and molting can be naturally achieved in juvenile crustaceans within a few days to two weeks (as per our observations), a process that in adult crustaceans may take as long as two months (Skinner, 1985). To date, there is no published data elaborating on the manner and/or rate in which gastrolith chitin layers are formed. In any case, it is a continuous process that requires fast maturation of each newly formed stratum while the next is already being secreted and, therefore, is likely to involve a set of hardening factors working in concert, including converted hemocyanins. Indeed, we found that our gastrolith

hemocyanins can function as phenoloxidases in the presence of SDS, as was shown by Adachi et al. (2005) for cuticular hemocyanins.

In conclusion, it is already widely agreed that crustacean hemocyanins are not restricted to serving oxygen-carrying roles alone but can play a much wider array of roles that vary according to the animal's physiological status. Moreover, the location of crustacean hemocyanins is not restricted to the hemolymph, as they may be transferred to other tissues, where they can perform other functions. Accordingly, we detected several hemocyanins in the gastrolith matrix, a non-cellular temporary structure, where they may be maintained for the purpose of forming a rigid construct for calcium storage. As such, we propose that the presence of hemocyanins in the gastrolith may be required for fast hardening of the chitin scaffold in the highly dynamic process of gastrolith formation; however other possible functions cannot be excluded.

#### **List of symbols and abbreviations**

|                |                                   |     |
|----------------|-----------------------------------|-----|
| BSA            | bovine serum albumin              | 348 |
| CBB            | Coomassie brilliant blue staining | 349 |
| FDR            | false discovery rate              | 350 |
| GAP            | gastrolith protein                | 351 |
| HRP            | horseradish peroxidase            | 352 |
| MMI            | molt mineralization index         | 353 |
| M <sub>r</sub> | molecular weight standards        | 354 |
| MS             | Mass spectrometry                 | 355 |
| NC             | negative control                  | 356 |
| PBS            | phosphate-buffered saline         | 357 |
| TBST           | Tris-buffered saline Tween        | 358 |
| TSA            | Transcriptome Shotgun Assembly    | 359 |
| XO-SG          | X organ-sinus gland               | 360 |

#### **Acknowledgments**

We thank Aviv Ziv, Tom Levi and Omri Lapidot for technical assistance. Animals were supplied by Ayana Benet Perlberg of the Dor Agriculture Center, Department of Fisheries and Aquaculture, Israel Ministry of Agriculture and Rural Development.

#### **Funding**

This work was supported by the Israel Science Foundation (grant 102/09).

|                                                                                                                                                                                                                                                                                                                                                                                                                                                                                                                                                                                                                                                                                                                                                                                                                                                |                                                                           |
|------------------------------------------------------------------------------------------------------------------------------------------------------------------------------------------------------------------------------------------------------------------------------------------------------------------------------------------------------------------------------------------------------------------------------------------------------------------------------------------------------------------------------------------------------------------------------------------------------------------------------------------------------------------------------------------------------------------------------------------------------------------------------------------------------------------------------------------------|---------------------------------------------------------------------------|
| <b>Figure captions</b>                                                                                                                                                                                                                                                                                                                                                                                                                                                                                                                                                                                                                                                                                                                                                                                                                         | 368                                                                       |
| Fig. 1- SDS-PAGE separation followed by Coomassie brilliant blue (CBB) staining of gastrolith 75-85 kDa bands (Gast, middle) and hemolymph hemocyanin (Hem, right). The bands in each lane were excised as marked by the rectangles, trypsinized and sequenced by mass spectrometry (see also Table 1). M <sub>r</sub> - molecular weight standards.                                                                                                                                                                                                                                                                                                                                                                                                                                                                                           | 369<br>370<br>371<br>372                                                  |
| Fig. 2- Gastrolith hemocyanins identified by western blot analysis (A) and immunohistochemistry (B). A. Left panel- CBB-stained SDS-PAGE gel of BSA, hemolymph (Hem) and gastrolith proteins (Gast). Right panel- Western blot with anti-hemocyanin antibodies. B. Left panel- H&E staining of the gastrolith pouch (Bar = 200µm, boxed area is magnified in middle and right panels). Middle panel- hemocyanins observed in the gastrolith matrix, as well as the cytoplasm of gastrolith-forming epithelium and adjacent connective tissue cells, as demonstrated by the binding of goat anti-rabbit FITC-conjugated antibodies (Bar = 25µm). Right panel- a merged image of hemocyanins identified by FITC and of DAPI counterstain used to identify nuclei in the gastrolith-forming epithelium and connective tissue (Bar = 25µm).        | 373<br>374<br>375<br>376<br>377<br>378<br>379<br>380<br>381<br>382<br>383 |
| Fig. 3- <i>Hemocyanin</i> -family transcripts identified by 454-sequencing. A. Blast2GO analysis of 3,520 putative genes (isotigs) from 454-sequencing of <i>C. quadricarinatus</i> gastrolith-forming and sub-cuticular epithelia. Left pie- 43% of the sequences showed no significant similarity to any protein in the UniProt database, 3% were similar to predicted proteins, and 54% were similar to annotated proteins. Right pie- GO (gene ontology) categories of the annotated sequences, including 16 putative <i>hemocyanin</i> -family transcripts. B. List of the 16 isotigs identified as putative <i>hemocyanin</i> -family transcripts, their specific annotation and ( <i>C. quadricarinatus</i> ) Cq name. The 13 final sequences in the table were deposited at DDBJ/EMBL/GenBank under the accession number GADE01000000. | 384<br>385<br>386<br>387<br>388<br>389<br>390<br>391<br>392<br>393        |
| Fig. 4- <i>CqHc</i> expression patterns in various crayfish tissues, as demonstrated by RT-PCR (upper panel). Total RNA was extracted from pre-molt gastrolith-forming epithelium (GFE), sub-cuticular epithelium (SCE), muscle (Mus), hepatopancreas (Hep), testes (Tes) and hemocytes (Hem). Actin was used to confirm RNA extraction (lower panel). RNA from the hepatopancreas served as negative control (NC), ruling out genomic contamination.                                                                                                                                                                                                                                                                                                                                                                                          | 394<br>395<br>396<br>397<br>398<br>399                                    |
| Fig. 5- Phenoloxidase activity of gastrolith hemocyanin. SDS-PAGE-separated, DEAE-purified gastrolith hemocyanin (1), total gastrolith soluble proteins (2), hemolymph                                                                                                                                                                                                                                                                                                                                                                                                                                                                                                                                                                                                                                                                         | 400<br>401                                                                |

hemocyanin (3) and BSA (4) stained with CBB (A), transferred to nitrocellulose 402  
membranes and subjected to phenoloxidase enzyme assay (B) or probed with anti- 403  
hemocyanin antibodies (C). Bands marked by a and b are hemocyanins and GAP 65 404  
(respectively), as they appear in the total gastrolith soluble protein profile. 405  
406

|                                                                                                                                                                                                                                                                                       |                   |
|---------------------------------------------------------------------------------------------------------------------------------------------------------------------------------------------------------------------------------------------------------------------------------------|-------------------|
| <b>References</b>                                                                                                                                                                                                                                                                     | 407               |
| <b>Adachi, K., Endo, H., Watanabe, T., Nishioka, T. and Hirata, T.</b> (2005). Hemocyanin in the exoskeleton of crustaceans: enzymatic properties and immunolocalization. <i>Pigment Cell Res.</i> <b>18</b> , 136-143.                                                               | 408<br>409<br>410 |
| <b>Adachi, K., Hirata, T., Nagai, K. and Sakaguchi, M.</b> (2001). Hemocyanin a most likely inducer of black spots in kuruma prawn <i>Penaeus japonicus</i> during storage. <i>J. Food Sci.</i> <b>66</b> , 1130-1136.                                                                | 411<br>412        |
| <b>Aspan, A., Huang, T. S., Cerenius, L. and Soderhall, K.</b> (1995). cDNA cloning of prophenoloxidase from the fresh-water crayfish <i>Pacifastacus leniusculus</i> and its activation. <i>Proc. Natl. Acad. Sci. U. S. A.</i> <b>92</b> , 939-943.                                 | 413<br>414<br>415 |
| <b>Bentov, S., Weil, S., Glazer, L., Sagi, A. and Berman, A.</b> (2010). Stabilization of amorphous calcium carbonate by phosphate rich organic matrix proteins and by single phosphoamino acids. <i>J. Struct. Biol.</i> <b>171</b> , 207-215.                                       | 416<br>417<br>418 |
| <b>Blackwell, J. and Weih, M. A.</b> (1980). Structure of chitin-protein complexes - ovipositor of the ichneumon fly <i>Megarhyssa</i> . <i>J. Mol. Biol.</i> <b>137</b> , 49-60.                                                                                                     | 419<br>420        |
| <b>Bouligand, Y.</b> (1972). Twisted fibrous arrangements in biological-materials and cholesteric mesophases. <i>Tissue Cell</i> <b>4</b> , 189-217.                                                                                                                                  | 421<br>422        |
| <b>Burmester, T.</b> (2002). Origin and evolution of arthropod hemocyanins and related proteins. <i>J. Comp. Physiol. B Biochem. Syst. Environ. Physiol.</i> <b>172</b> , 95-107.                                                                                                     | 423<br>424        |
| <b>Decker, H. and Jaenicke, E.</b> (2004). Recent findings on phenoloxidase activity and antimicrobial activity of hemocyanins. <i>Dev. Comp. Immunol.</i> <b>28</b> , 673-687.                                                                                                       | 425<br>426        |
| <b>Durstewitz, G. and Terwilliger, N. B.</b> (1997). Developmental changes in hemocyanin expression in the Dungeness crab, <i>Cancer magister</i> . <i>J. Biol. Chem.</i> <b>272</b> , 4347-4350.                                                                                     | 427<br>428        |
| <b>Gellissen, G., Hennecke, R. and Spindler, K. D.</b> (1991). The site of synthesis of hemocyanin in the crayfish, <i>Astacus leptodactylus</i> . <i>Experientia</i> <b>47</b> , 194-195.                                                                                            | 429<br>430        |
| <b>Glazer, L. and Sagi, A.</b> (2012). On the involvement of proteins in the assembly of the crayfish gastrolith extracellular matrix. <i>Invertebr. Reprod. Dev.</i> <b>56</b> , 57-65.                                                                                              | 431<br>432        |
| <b>Glazer, L., Shechter, A., Tom, M., Yudkovski, Y., Weil, S., Aflalo, E. D., Pamuru, R. R., Khalaila, I., Bentov, S., Berman, A. et al.</b> (2010). A protein involved in the assembly of an extracellular calcium storage matrix. <i>J. Biol. Chem.</i> <b>285</b> , 12831-9.       | 433<br>434<br>435 |
| <b>Jaenicke, E., Foll, R. and Decker, H.</b> (1999). Spider hemocyanin binds ecdysone and 20-OH-ecdysone. <i>J. Biol. Chem.</i> <b>274</b> , 34267-34271.                                                                                                                             | 436<br>437        |
| <b>Kuballa, A. V. and Elizur, A.</b> (2008). Differential expression profiling of components associated with exoskeletal hardening in crustaceans. <i>BMC Genomics</i> <b>9</b> , 575.                                                                                                | 438<br>439        |
| <b>Kuballa, A. V., Holton, T. A., Paterson, B. and Elizur, A.</b> (2011). Moulting cycle specific differential gene expression profiling of the crab <i>Portunus pelagicus</i> . <i>BMC Genomics</i> <b>12</b> , 147.                                                                 | 440<br>441        |
| <b>Laemmli, U. K.</b> (1970). Cleavage of structural proteins during assembly of head of bacteriophage-T4. <i>Nature</i> <b>227</b> , 680-685.                                                                                                                                        | 442<br>443        |
| <b>Lee, S. Y., Lee, B. L. and Soderhall, K.</b> (2004). Processing of crayfish hemocyanin subunits into phenoloxidase. <i>Biochem. Biophys. Res. Commun.</i> <b>322</b> , 490-496.                                                                                                    | 444<br>445        |
| <b>Lowenstam, H. A. and Weiner, S.</b> (1989). On biomineralization New-York: Oxford University Press.                                                                                                                                                                                | 446               |
| <b>Luquet, G. and Marin, F.</b> (2004). Biomineralisations in crustaceans: storage strategies. <i>C. R. Palevol.</i> <b>3</b> , 515-534.                                                                                                                                              | 447<br>448        |
| <b>Markl, J. and Decker, H.</b> (1992). Molecular structure of the arthropod hemocyanins. <i>Adv. Comp. Environ. Physiol.</i> <b>13</b> , 325-376.                                                                                                                                    | 449<br>450        |
| <b>Nellaiappan, K. and Vinayakam, A.</b> (1993). A method for demonstrating prophenoloxidase after electrophoresis. <i>Biotech. Histochem.</i> <b>68</b> , 193-195.                                                                                                                   | 451<br>452        |
| <b>Raabe, D., Romano, P., Sachs, C., Al-Sawalmih, A., Brokmeier, H. G., Yi, S. B., Servos, G. and Hartwig, H. G.</b> (2005). Discovery of a honeycomb structure in the twisted plywood patterns of fibrous biological nanocomposite tissue. <i>J. Cryst. Growth</i> <b>283</b> , 1-7. | 453<br>454<br>455 |
| <b>Roer, R. and Dillaman, R.</b> (1984). The structure and calcification of the crustacean cuticle. <i>Am. Zool.</i> <b>24</b> , 893-909.                                                                                                                                             | 456<br>457        |

|                                                                                                                                                                                                                                                                                                                                   |                                 |
|-----------------------------------------------------------------------------------------------------------------------------------------------------------------------------------------------------------------------------------------------------------------------------------------------------------------------------------|---------------------------------|
| <b>Roth, Z., Parnes, S., Wiel, S., Sagi, A., Zmora, N., Chung, J. S. and Khalaila, I.</b> (2010). <i>N</i> -glycan moieties of the crustacean egg yolk protein and their glycosylation sites. <i>Glycoconj J</i> <b>27</b> , 159-169.                                                                                             | 458<br>459                      |
| <b>Schagger, H. and von Jagow, G.</b> (1987). Tricine sodium dodecyl-sulfate polyacrylamide-gel electrophoresis for the separation of proteins in the range from 1-kDa to 100-kDa. <i>Anal. Biochem.</i> <b>166</b> , 368-379.                                                                                                    | 460<br>461<br>462               |
| <b>Shechter, A., Berman, A., Singer, A., Freiman, A., Grinstein, M., Erez, J., Aflalo, D. E. and Sagi, A.</b> (2008a). Reciprocal changes in calcification of the gastrolith and cuticle during the molt cycle of the red claw crayfish <i>Cherax quadricarinatus</i> . <i>Biol. Bull.</i> <b>214</b> , 122-134.                  | 463<br>464<br>465               |
| <b>Shechter, A., Glazer, L., Chaled, S., Mor, E., Weil, S., Berman, A., Bentov, S., Aflalo, D. E., Khalaila, I. and Sagi, A.</b> (2008b). A gastrolith protein serving a dual role in the formation of extracellular matrix containing an amorphous mineral. <i>Proc. Natl. Acad. Sci. U. S. A.</i> <b>105</b> , 7129-7134.       | 466<br>467<br>468               |
| <b>Shechter, A., Tom, M., Yudkovski, Y., Weil, S., Chang, S. A., Chang, E. S., Chalifa-Caspi, V., Berman, A. and Sagi, A.</b> (2007). Search for hepatopancreatic ecdysteroid-responsive genes during the crayfish molt cycle: from a single gene to multigenicity. <i>J. Exp. Biol.</i> <b>210</b> , 3525-3537.                  | 469<br>470<br>471               |
| <b>Skinner, D. M.</b> (1985). Molting and regeneration. In <i>The Biology of Crustacea</i> , vol. 9 (ed. D. E. Bliss), pp. 44-128. New York Academic Press.                                                                                                                                                                       | 472<br>473                      |
| <b>Soderhall, K. and Cerenius, L.</b> (1998). Role of the prophenoloxidase-activating system in invertebrate immunity. <i>Curr. Opin. Immunol.</i> <b>10</b> , 23-28.                                                                                                                                                             | 474<br>475                      |
| <b>Sugumaran, M.</b> (1998). Unified mechanism for sclerotization of insect cuticle. <i>Adv Insect Physiol</i> <b>27</b> , 229-334.                                                                                                                                                                                               | 476<br>477                      |
| <b>Terwilliger, N. B.</b> (2007). Hemocyanins and the immune response: defense against the dark arts. <i>Integ. Comp. Biol.</i> <b>47</b> , 662-665.                                                                                                                                                                              | 478<br>479                      |
| <b>Terwilliger, N. B., Ryan, M. C. and Towle, D.</b> (2005). Evolution of novel functions: cryptocyanin helps build new exoskeleton in Cancer magister. <i>J. Exp. Biol.</i> <b>208</b> , 2467-2474.                                                                                                                              | 480<br>481                      |
| <b>Tom, M., Shenker, O. and Ovadia, M.</b> (1993). Partial characterization of 3 hemolymph-proteins of <i>Penaeus-semisulcatus</i> Dehaan (Crustacea, Decapoda, Penaeidae) and their specific antibodies. <i>Comp. Biochem. Physiol. Part B Biochem. Mol. Biol.</i> <b>104</b> , 811-816.                                         | 482<br>483<br>484               |
| <b>Travis, D. F.</b> (1960). The deposition of skeletal structures in the Crustacea. 1. The histology of the gastrolith skeletal tissue complex and the gastrolith in the crayfish, <i>Orconectes (cambaus) verilis</i> Hagen - Decapoda. <i>Biol. Bull. (Woods Hole)</i> <b>16</b> , 137-149.                                    | 485<br>486<br>487               |
| <b>Travis, D. F.</b> (1963a). The deposition of skeletal structures in the crustacea. 2. The histochemical changes associated with the development of the nonmineralized skeletal components of the gastrolith discs of the crayfish, <i>Orconectes virilis hagen</i> . <i>Acta Histochem.</i> <b>15</b> , 251-268.               | 488<br>489<br>490               |
| <b>Travis, D. F.</b> (1963b). The deposition of skeletal structures in the Crustacea. 3. The histochemical changes associated with the development of the mineralized gastroliths in the crayfish, <i>Orconectes Virilis Hagen</i> . <i>Acta Histochem.</i> <b>15</b> , 269-284.                                                  | 491<br>492<br>493               |
| <b>Ueno, M.</b> (1980). Calcium-transport in crayfish gastrolith disk - morphology of gastrolith disk and ultrahistochemical demonstration of calcium. <i>J. Exp. Zool.</i> <b>213</b> , 161-171.                                                                                                                                 | 494<br>495                      |
| <b>van Holde, K. E. and Miller, K. I.</b> (1995). Hemocyanins. <i>Adv. Protein Chem.</i> <b>47</b> , 1-81.                                                                                                                                                                                                                        | 496                             |
| <b>Yudkovski, Y., Glazer, L., Shechter, A., Reinhardt, R., Chalifa-Caspi, V., Sagi, A. and Tom, M.</b> (2010). Multi-transcript expression patterns in the gastrolith disk and the hypodermis of the crayfish <i>Cherax quadricarinatus</i> at premolt. <i>Comp. Biochem. Physiol., Part D: Genom. Proteom.</i> <b>5</b> , 171-7. | 497<br>498<br>499               |
| <b>Yudkovski, Y., Shechter, A., Chalifa-Caspi, V., Auslander, M., Ophir, R., Dauphin-Villemant, C., Waterman, M., Sagi, A. and Tom, M.</b> (2007). Hepatopancreatic multi-transcript expression patterns in the crayfish <i>Cherax quadricarinatus</i> during the moult cycle. <i>Insect Mol. Biol.</i> <b>16</b> , 661-674.      | 500<br>501<br>502<br>503<br>504 |



$M_r$

Gast

Hem

95 kDa

72 kDa

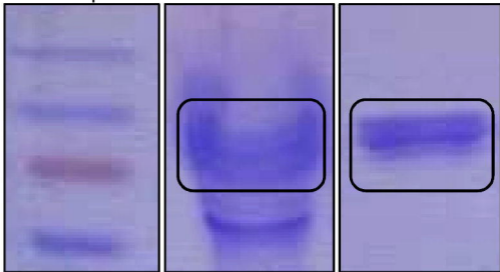

Table 1: Liquid chromatography-tandem MS analysis of the gastrolith 75-85 kDa bands and hemolymph hemocyanin.

| Protein           | Peptide sequences | Peptide mass (Da) | XCorr |
|-------------------|-------------------|-------------------|-------|
| <b>Gastrolith</b> |                   |                   |       |
| Asl b             | DSYGYHLDR         | 1125.5            | 2.66  |
|                   | DPSFFR            | 768.37            | 1.47  |
| Cdes c            | QHDVNYLLFK        | 1276.68           | 2.39  |
| CaeSS2            | YMDNIFR           | 974.45            | 2.27  |
|                   | DPAFFR            | 752.38            | 1.66  |
|                   | DSLTPYTK          | 924.47            | 1.05  |
| <b>Hemolymph</b>  |                   |                   |       |
| Cdes c            | QHDVNYLLFK        | 1276.68           | 2.77  |
| Cdes a            | QHDINFLLFK        | 1274.7            | 2.5   |
| Pint b            | HWFSLFNTR         | 1207.6            | 2.36  |
|                   | FNLPPGVMEHFETATR  | 1861.9            | 2.14  |
| Pint c            | YMDNIFR           | 974.45            | 2.05  |
|                   | DPSFFR            | 768.37            | 1.96  |

*Astacus leptodactylus* hemocyanin B chain (Asl b), *Cherax destructor* Clark hemocyanin C chain (Cdes c), *Carcinus aestuarii* Nardo structural subunit 2 (CaeSS2), *C. destructor* hemocyanin A chain (Cdes a), *Panulirus interruptus* hemocyanin B chain (Pint b) and *P. interruptus* J. W. Randall hemocyanin C chain (Pint c). Hemolymph hemocyanin served as positive control.

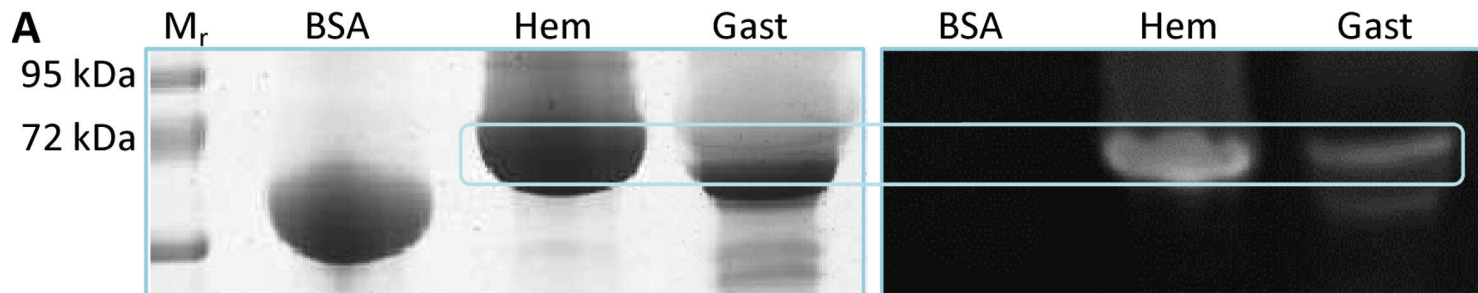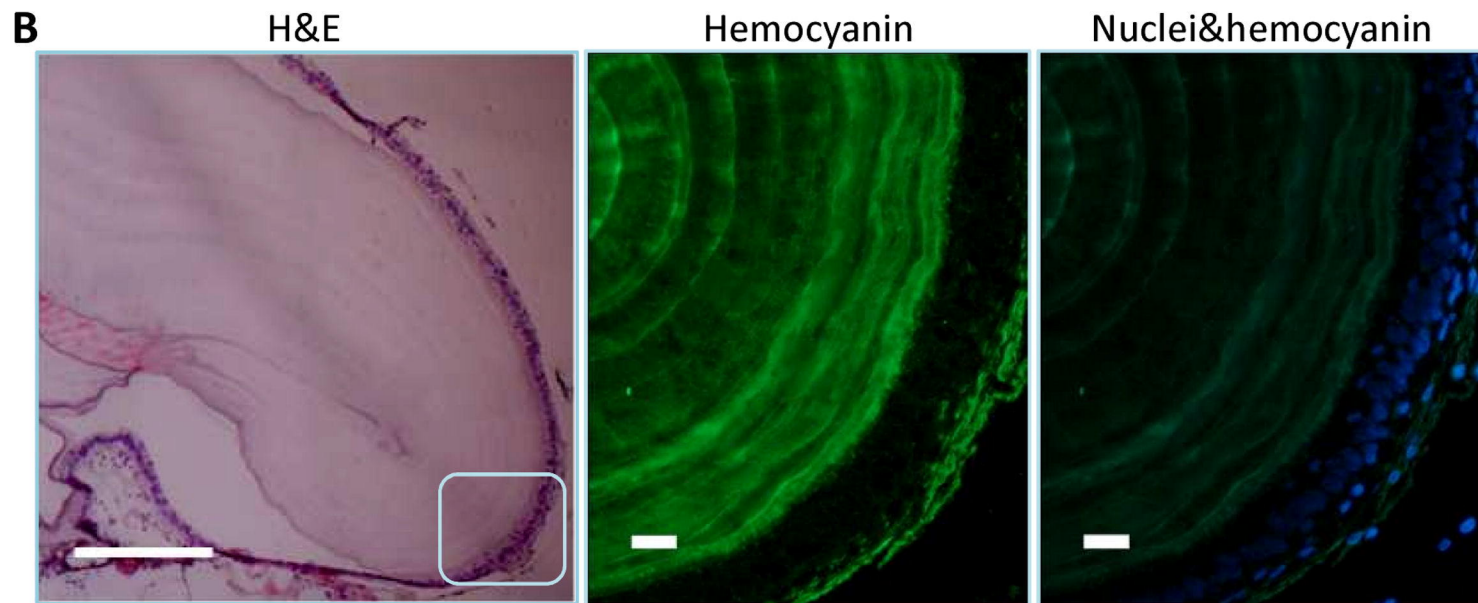

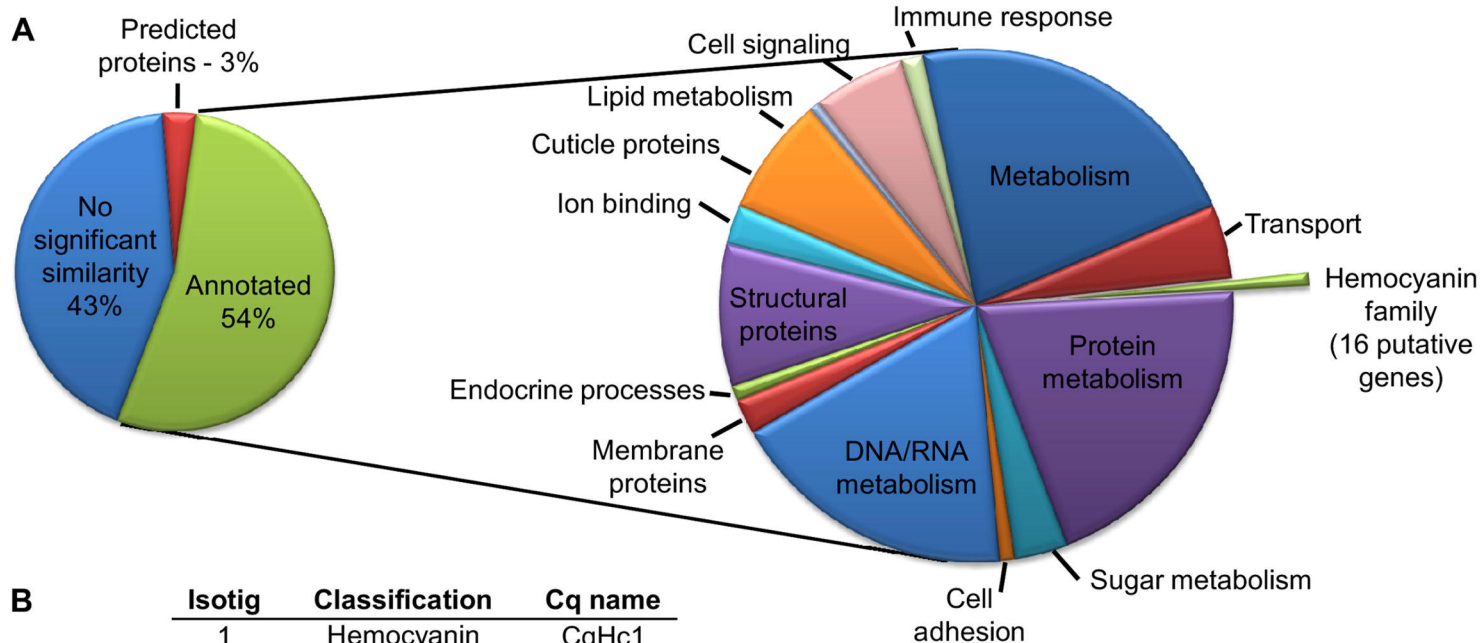

**B**

| Isotig | Classification   | Cq name |
|--------|------------------|---------|
| 1      | Hemocyanin       | CqHc1   |
| 2      | Hemocyanin       | CqHc2   |
| 3-6    | Hemocyanin       | CqHc3   |
| 7      | Hemocyanin       | CqHc4   |
| 8      | Hemocyanin       | CqHc5   |
| 9      | Hemocyanin       | CqHc6   |
| 10     | Hemocyanin       | CqHc7   |
| 11     | Hemocyanin       | CqHc8   |
| 12     | Hemocyanin       | CqHc9   |
| -----  |                  |         |
| 13     | Cryptocyanin     | CqCc1   |
| 14     | Cryptocyanin     | CqCc2   |
| 15     | Cryptocyanin     | CqCc3   |
| -----  |                  |         |
| 16     | Prophenoloxidase | CqPPO1  |

Table 2: Specific MS-based identification of *C. quadricarinatus* hemocyanin-derived peptides in gastrolith 75-85 kDa bands and hemolymph hemocyanin using 454-sequencing results as database.

| Protein           | M, [kDa] | #AA | Sequest score | #Peptides | #Unique peptides |
|-------------------|----------|-----|---------------|-----------|------------------|
| <b>Gastrolith</b> |          |     |               |           |                  |
| CqHc4             | 76.8     | 673 | 164.11        | 20        | 9                |
| CqHc2             | 76.8     | 669 | 155.67        | 28        | 18               |
| CqHc5             | 76.1     | 659 | 73.31         | 13        | 9                |
| CqHc1             | 77.5     | 674 | 62.31         | 28        | 26               |
| CqHc6             | 75.4     | 659 | 60.31         | 9         | 1                |
| CqHc7             | 75.7     | 659 | 58.47         | 8         | 1                |
| CqHc3             | 59.2     | 510 | 29.56         | 17        | 13               |
| <b>Hemolymph</b>  |          |     |               |           |                  |
| CqHc1             | 77.5     | 674 | 545.81        | 34        | 34               |
| CqHc2             | 76.8     | 669 | 310.94        | 27        | 16               |
| CqHc3             | 59.2     | 510 | 304.05        | 23        | 23               |
| CqHc4             | 76.8     | 673 | 269.54        | 24        | 13               |
| CqHc5             | 76.1     | 659 | 191.35        | 33        | 25               |
| CqHc6             | 75.4     | 659 | 174.51        | 22        | 4                |
| CqHc7             | 75.7     | 659 | 165.34        | 23        | 6                |
| CqHc8             | 29.3     | 255 | 27.41         | 4         | 4                |

*C. quadricarinatus* hemocyanin (CqHc) proteins were numbered according to sequest scores calculated for the hemolymph proteins. #AA- number of amino acids. #Peptides- only peptides with XCorr > 1. Unique peptides- not shared with other protein hits.



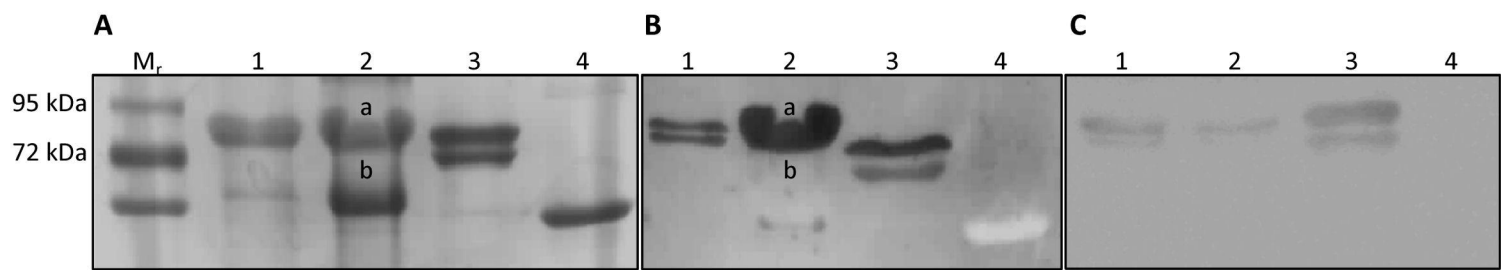

Source: https://cob.silverchair.com/jeb/article-pdf/doi/10.1242/jeb.080945/2036712/jeb_080945.pdf
